# Supplementary material for: Anopheles mosquito surveillance in Madagascar reveals multiple blood feeding behavior and Plasmodium infection
Source: PLoS Negl Trop Dis. 2019 Jul 5;13(7):e0007176. doi: 10.1371/journal.pntd.0007176 (PMC6663035; doi:10.1371/journal.pntd.0007176)
Supplement: S7 Table — (XLSX) [file pntd.0007176.s010.xlsx]

## Sheet: Sheet1
		Ambolodina - 2017																Amparihy - 2017
		AMB1				AMB2				AMB3								AMP1				AMP2				AMP3
		1(NW)	2(NE)	3(SW)	4(SE)	1(NW)	2(NE)	3(SW)	4(SE)	1(NW)	2(NE)	3(SW)	4(SE)	Totals				1(NW)	2(NE)	3(SW)	4(SE)	1(NW)	2(NE)	3(SW)	4(SE)	1(NW)	2(NE)	3(SW)	4(SE)	Totals
	H	0	0	0	0	0	0	0	0	0	0	0	0	0			H	0	0	0	0	0	0	0	0	0	0	0	0	0
	C	4	12	9	3	4	4	4	5	7	9	23	33	117			C	0	1	0	0	0	0	0	0	0	0	1	0	2
	P	1	1	1	1	0	0	0	0	0	1	2	0	7			P	0	0	0	0	0	0	0	0	0	0	0	1	1
	D	0	0	0	0	0	0	0	0	0	0	0	0	0			D	0	0	0	0	0	0	0	0	0	0	0	0	0
	HC	9	5	4	10	0	3	4	5	2	6	9	27	84			HC	0	0	0	0	0	0	0	0	0	0	0	0	0
	HP	0	0	0	0	0	0	0	0	0	0	0	0	0			HP	0	0	1	0	0	0	0	0	0	0	0	0	1
	HD	0	0	0	0	0	0	0	0	0	0	0	0	0			HD	0	0	0	0	0	0	0	0	0	0	0	0	0
	HK	0	0	0	0	0	0	0	0	0	0	0	0	0			HK	0	0	0	0	0	0	0	0	0	0	0	0	0
	CP	4	5	6	3	0	4	3	2	6	5	5	11	54			CP	10	12	19	5	1	2	2	5	1	1	1	1	60
	CD	0	0	0	2	0	1	2	0	0	3	0	0	8			CD	0	0	0	0	0	0	0	0	0	0	0	0	0
	PD	0	0	0	0	0	0	0	0	0	0	0	0	0			PD	0	0	0	0	0	0	0	0	0	0	0	0	0
	HCP	0	0	0	0	1	0	0	0	1	0	0	3	5			HCP	0	1	0	0	0	0	0	1	0	0	0	0	2
	HCD	0	1	1	1	1	0	4	1	0	0	2	1	12			HCD	0	0	0	0	0	0	0	0	0	0	0	0	0
	HPD	0	0	0	0	0	0	0	0	0	0	0	0	0			HPD	0	0	0	0	0	0	0	0	0	0	0	0	0
	CPD	0	0	0	1	2	0	0	0	0	1	0	0	4			CPD	0	0	0	0	0	0	0	0	0	0	0	0	0
	CPG	0	1	0	0	0	0	0	0	0	0	0	0	1			CPG	0	0	0	0	0	0	0	0	0	0	0	0	0
	CPK	0	0	0	0	0	0	0	0	0	0	0	0	0			CPK	0	0	0	0	0	0	0	0	0	0	1	0	1
	none	7	5	0	0	4	0	0	0	4	1	10	2	33			none	0	0	0	1	0	0	0	0	0	0	0	0	1
		25	30	21	21	12	12	17	13	20	26	51	77	325				10	14	20	6	1	2	2	6	1	1	3	2	68
		Ambolodina - 2018																Amparihy - 2018
		AMB1				AMB2				AMB3								AMP1				AMP2				AMP3
		1(NW)	2(NE)	3(SW)	4(SE)	1(NW)	2(NE)	3(SW)	4(SE)	1(NW)	2(NE)	3(SW)	4(SE)	Totals				1(NW)	2(NE)	3(SW)	4(SE)	1(NW)	2(NE)	3(SW)	4(SE)	1(NW)	2(NE)	3(SW)	4(SE)	Total
	H	0	0	0	0	0	0	0	0	0	0	0	0	0			H	18	10	8	9	2	3	6	13	5	1	1	2	78
	C	38	18	16	6	8	10	15	18	11	6	6	3	155			C	22	5	4	3	10	17	16	18	33	17	23	26	194
	P	0	0	0	0	0	0	0	0	0	0	0	0	0			P	0	1	0	0	3	3	2	1	2	1	2	0	15
	D	0	1	0	0	0	0	0	0	0	0	0	0	1			D	0	0	0	0	0	0	0	0	0	0	0	1	1
	HC	12	7	8	9	10	5	5	11	13	8	9	8	105			HC	22	11	4	6	7	11	11	10	18	8	13	5	126
	HP	0	0	0	0	0	0	0	0	0	0	0	0	0			HP	0	0	0	0	0	1	0	0	0	0	1	0	2
	HD	0	0	1	0	0	0	0	0	0	0	0	0	1			HD	0	2	0	1	0	0	0	0	0	0	1	0	4
	HK	0	0	0	0	0	0	0	0	0	0	0	0	0			HK	0	1	0	0	0	0	0	0	0	0	0	0	1
	CP	0	0	1	0	0	1	0	1	0	0	0	0	3			CP	1	0	0	0	2	0	1	0	2	2	2	2	12
	CD	1	0	0	0	1	0	0	0	0	1	0	0	3			CD	0	1	0	0	0	0	0	0	0	1	0	0	2
	PD	0	0	0	0	0	0	0	0	0	0	0	0	0			PD	0	0	0	0	1	0	0	0	0	0	0	0	1
	HCP	0	0	0	0	0	0	0	0	0	0	0	0	0			HCP	0	0	0	0	0	0	0	0	0	0	0	0	0
	HCD	0	0	0	0	1	1	0	2	0	1	2	1	8			HCD	3	1	0	1	2	1	3	0	0	1	0	0	12
	HPD	0	0	0	0	0	0	0	0	0	0	0	0	0			HPD	0	0	0	0	0	1	0	0	0	0	2	0	3
	CPD	1	0	0	0	0	0	0	0	0	0	0	0	1			CPD	0	0	0	0	0	0	0	0	0	0	0	0	0
	CPG	0	0	0	0	0	0	0	0	0	0	0	0	0			CPG	0	0	0	0	0	0	0	0	0	0	0	0	0
	CPK	0	0	0	0	0	0	0	0	0	0	0	0	0			CPK	0	0	0	0	0	0	0	0	0	0	0	0	0
	none	0	0	0	0	0	0	0	0	0	0	0	0	0			none	2	2	1	2	2	2	2	2	1	1	3	3	23
		52	26	26	15	20	17	20	32	24	16	17	12	277				68	34	17	22	29	39	41	44	61	32	48	39	474
