# Supplementary material for: Anopheles mosquito surveillance in Madagascar reveals multiple blood feeding behavior and Plasmodium infection
Source: PLoS Negl Trop Dis. 2019 Jul 5;13(7):e0007176. doi: 10.1371/journal.pntd.0007176 (PMC6663035; doi:10.1371/journal.pntd.0007176)
Supplement: S8 Table — (XLSX) [file pntd.0007176.s011.xlsx]

## Sheet: Sheet1
			Ambolodina - 2017															Amparihy - 2017
			AMB1				AMB2				AMB3							AMP1				AMP2				AMP3
			1(NW)	2(NE)	3(SW)	4(SE)	1(NW)	2(NE)	3(SW)	4(SE)	1(NW)	2(NE)	3(SW)	4(SE)	Total			1(NW)	2(NE)	3(SW)	4(SE)	1(NW)	2(NE)	3(SW)	4(SE)	1(NW)	2(NE)	3(SW)	4(SE)	Total
		F	0	0	0	0	0	0	0	0	0	0	1	1	2		F	0	0	0	0	0	0	0	0	0	0	0	0	0
		V	0	1	2	0	0	0	2	0	0	0	0	2	7		V	0	0	0	0	0	0	0	0	0	0	0	0	0
		M	0	0	0	2	0	0	0	0	0	0	1	0	3		M	0	0	0	0	0	0	0	0	0	0	0	0	0
		O	0	0	0	0	0	0	0	0	0	0	0	0	0		O	0	0	0	0	0	0	0	0	0	0	0	0	0
		FV	0	1	1	0	0	0	1	2	1	0	1	1	8		FV	0	0	0	0	0	0	0	0	0	0	0	0	0
		FM	0	0	0	0	0	0	0	0	0	0	0	0	0		FM	0	0	0	0	0	0	0	0	0	0	0	0	0
		FO	0	0	0	0	0	0	0	0	0	0	0	0	0		FO	0	0	0	0	0	0	0	0	0	0	0	0	0
		MO	0	0	0	1	0	0	0	0	0	0	0	0	1		MO	0	0	0	0	0	0	0	0	0	0	0	0	0
		NEG	25	28	18	18	12	12	14	11	19	26	48	73	304		NEG	10	14	20	6	1	2	2	6	1	1	3	2	68
		Total	25	30	21	21	12	12	17	13	20	26	51	77	325		Total	10	14	20	6	1	2	2	6	1	1	3	2	68
			Ambolodina - 2018															Amparihy - 2018
			AMB1				AMB2				AMB3							AMP1				AMP2				AMP3
			1(NW)	2(NE)	3(SW)	4(SE)	1(NW)	2(NE)	3(SW)	4(SE)	1(NW)	2(NE)	3(SW)	4(SE)	Total			1(NW)	2(NE)	3(SW)	4(SE)	1(NW)	2(NE)	3(SW)	4(SE)	1(NW)	2(NE)	3(SW)	4(SE)	Total
		F	7	3	3	1	2	2	0	1	1	0	0	0	20		F	3	5	1	1	2	0	0	1	1	1	2	0	17
		V	0	0	0	0	0	0	0	1	0	0	0	0	1		V	0	0	0	0	0	0	0	0	0	0	0	0	0
		M	0	0	0	0	0	0	0	0	0	0	0	0	0		M	0	0	1	0	0	0	1	0	1	0	0	2	5
		O	0	0	0	0	0	0	0	0	0	0	0	0	0		O	1	0	0	0	0	0	1	0	0	0	0	0	2
		FV	0	0	0	0	0	0	0	0	0	0	0	0	0		FV	0	0	0	0	0	0	0	0	0	0	0	0	0
		FM	0	0	0	0	0	0	0	0	0	0	0	0	0		FM	0	0	0	0	0	0	0	1	0	0	0	0	1
		FO	0	0	0	0	0	0	0	0	0	0	0	0	0		FO	0	0	0	0	0	0	0	0	0	0	0	0	0
		MO	0	0	0	0	0	0	0	0	0	0	0	0	0		MO	0	0	0	0	0	0	0	0	0	0	0	0	0
		NEG	45	23	23	14	18	15	20	30	23	16	17	12	256		NEG	64	29	15	21	27	39	39	42	59	31	46	37	449
		Total	52	26	26	15	20	17	20	32	24	16	17	12	277		Total	68	34	17	22	29	39	41	44	61	32	48	39	474
